# Supplementary material for: A fast curing assisted spray-coating method to fabricate a robust core–shell structured evaporator with stable solar vapor generation performance
Source: Royal Society of Chemistry journal article supplement (doi:10.1039/d2nr05159a), 2022-01-01
Supplement: d2nr05159a3.pdf [file d2nr05159a3.pdf]

## Supporting Information

### **Fast curing assisted spray-coating method to fabricate robust core-shell structured evaporator with stable solar vapor generation performance**

*Dongdong Ma, Xiangyi Zhang, Kaimin Deng, Jingjing Huang, Ruquan Zhang, Hongjun Yang, Xin Liu, Bin Shang\*, Shaojin Gu\**

*State Key Laboratory of New Textile Materials and Advanced Processing Technologies, School of Materials Science and Engineering, Wuhan Textile University, Wuhan, 430200, P. R. China*

\* Corresponding author, E-mail: [bshang@wtu.edu.cn](mailto:bshang@wtu.edu.cn); [gushaojin@hotmail.com](mailto:gushaojin@hotmail.com)

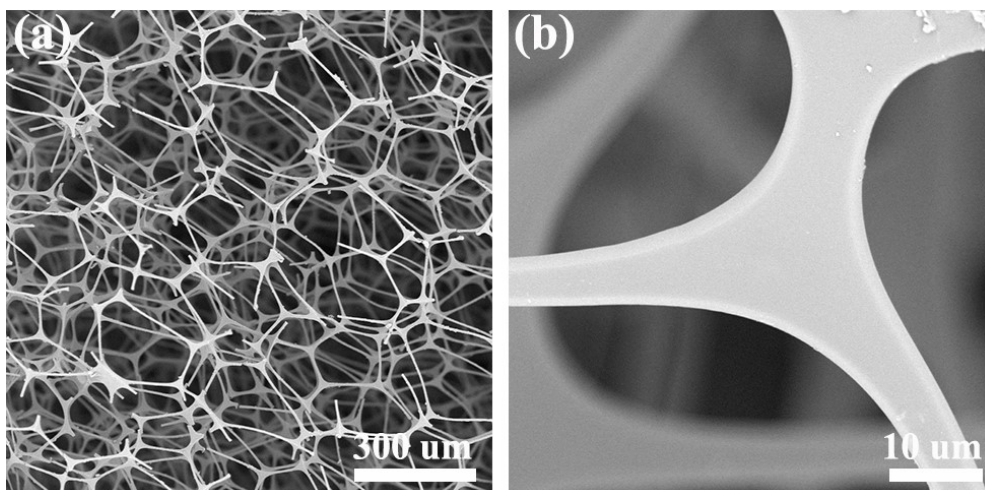

Fig. S1. (a, b) SEM images of the raw MF

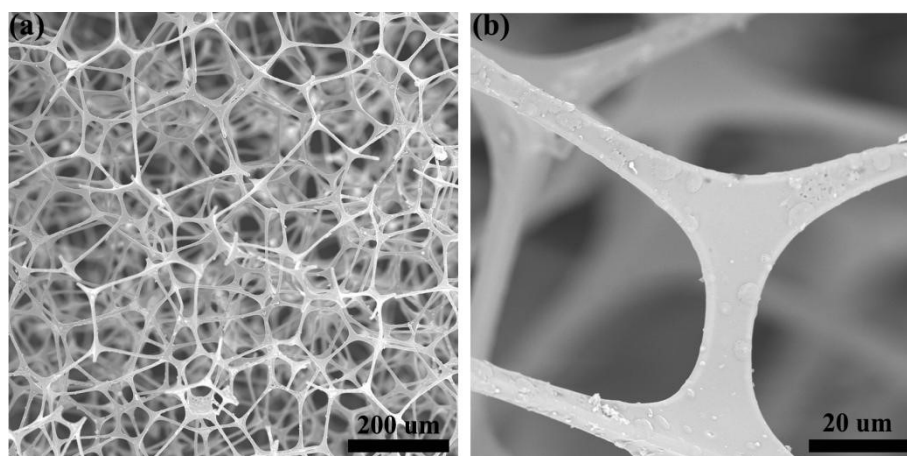

Fig. S2. (a, b) SEM images of the inner part of CB/MF evaporator.

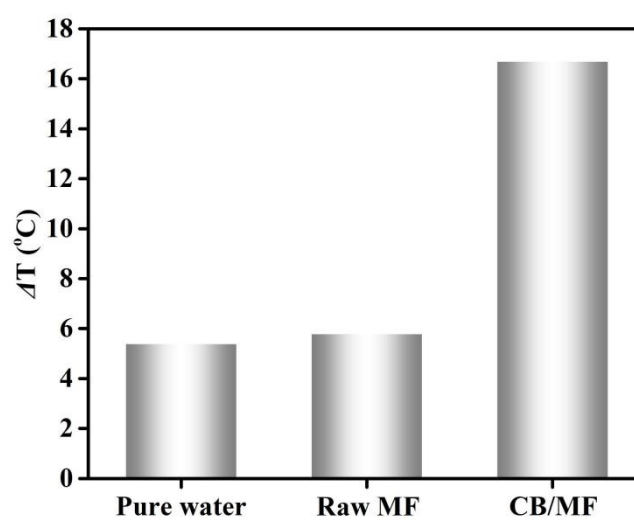

Fig. S3. (a) The heating value of the samples surface after 20 min of irradiation.

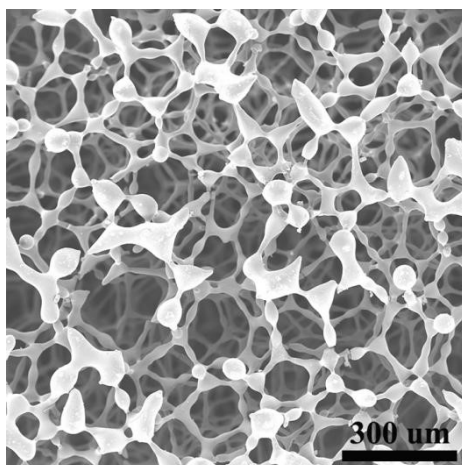

Fig. S4. SEM images of the external surface of CB/MF after 12 h of ultrasonic treatment.

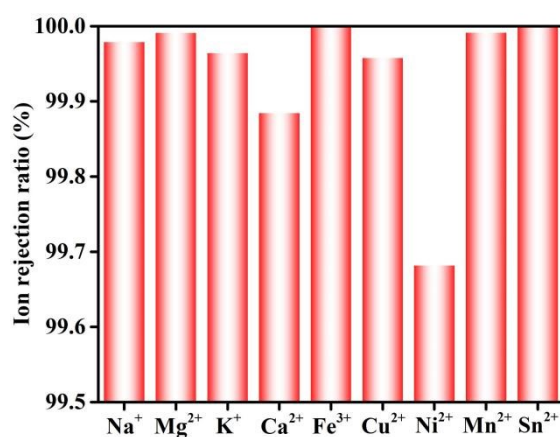

Fig. S5. The ion rejection ratio of simulated seawater and heavy metal wastewater.

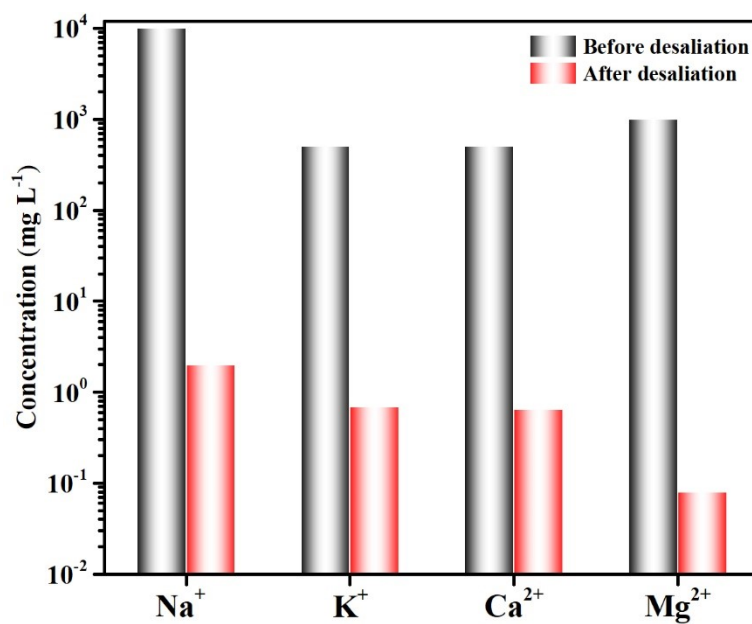

Fig. S6. Purification of simulated seawater in the outdoor environment.

### **Supplementary movie captions**

**Movie S1:** This movie shows the wetting behavior of water on the surface of raw MF.

**Movie S2:** This movie shows the wetting behavior of water on the inner uncoated part of CB/MF.
